# Supplementary material for: Target Mechanism of Iturinic Lipopeptide on Differential Expression Patterns of Defense-Related Genes against Colletotrichum acutatum in Pepper
Source: MDPI journal article supplement (doi:10.3390/plants11091267), 2022-05-09
Supplement: s1 [file s1]

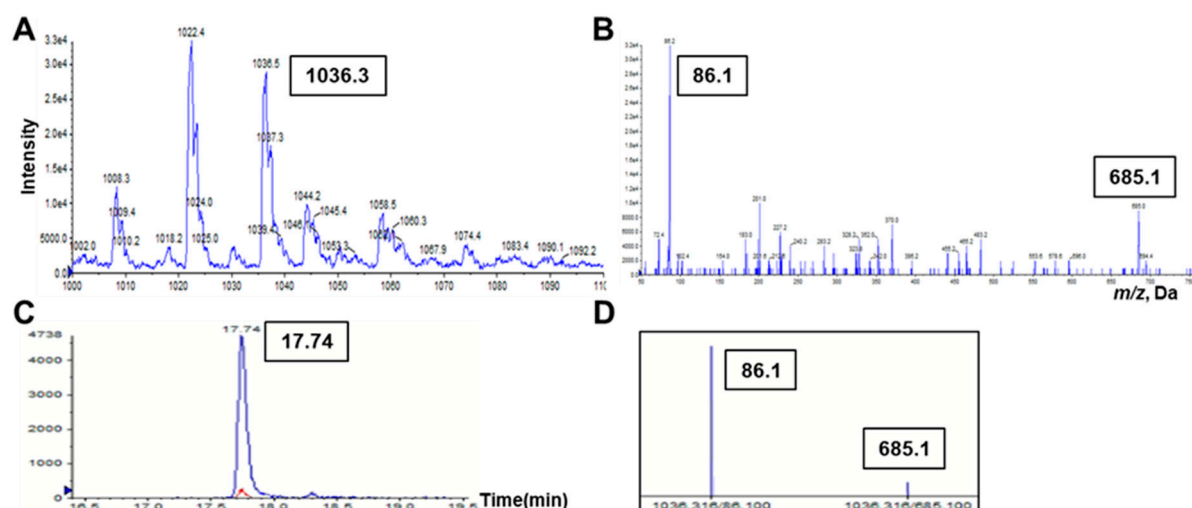

**Supplementary Figure S1.** Molecular ion peaks and mass spectra of surfactin of Bs KB21. (A) ESI-MS full scan MS (+) m/z corresponding to surfactin (B) Mass spectra corresponding to the peak m/z 1036.3 of surfactin (C) LC-MS/MS MRM chromatogram of surfactin standard at 0.05 mg/L (Retention time: 17.74 min) (D) Mass spectrum of surfactin (quantification ion: m/z 86.1 and qualification ion: m/z 685.1).

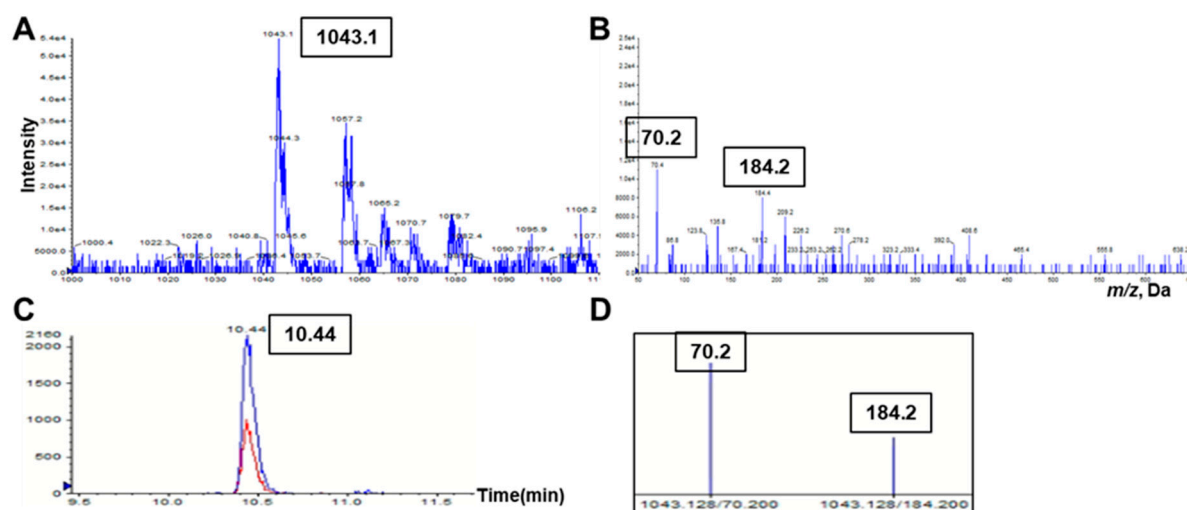

**Supplementary Figure S2.** Molecular ion peaks and mass spectra of iturin of *Bs* KB21.

(A) ESI-MS full scan MS (+)  $m/z$  corresponding to iturin (B) Mass spectra corresponding to the peak  $m/z$  1043.1 of iturin (C) LC-MS/MS MRM chromatogram of iturin A standard at 5 mg/L (Retention time: 10.44 min) (D) Mass spectrum of iturin (quantification ion:  $m/z$  70.2 and qualification ion:  $m/z$  184.2)

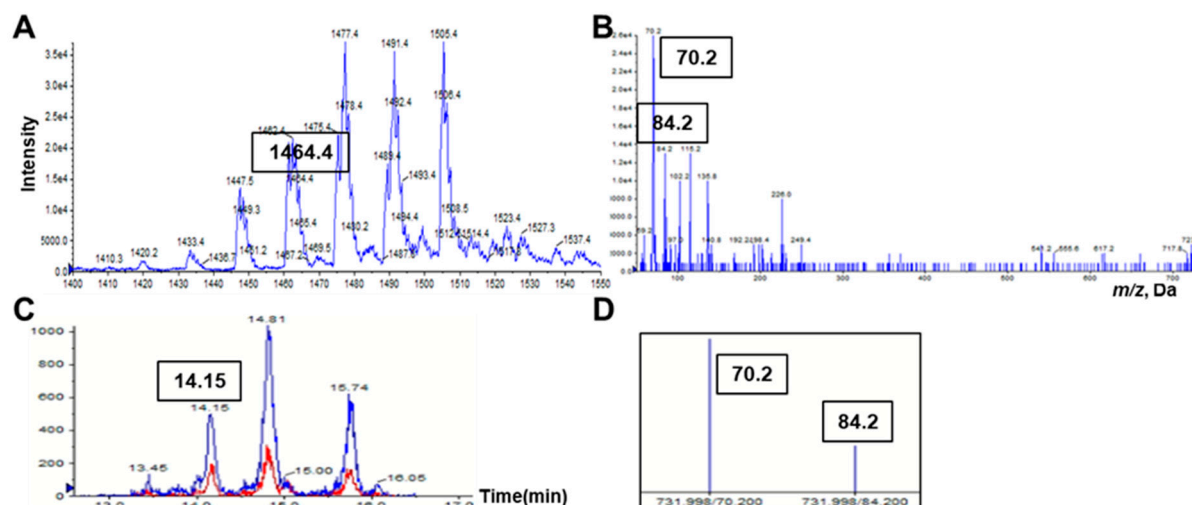

**Supplementary Figure S3.** Molecular ion peaks and mass spectra of fengycin of Bs KB21. (A) ESI-MS full scan MS (+) m/z corresponding to fengycin (B) Mass spectra corresponding to the peak m/z 1464.4 of fengycin (C) LC-MS/MS MRM chromatogram of fengycin standard at 5 mg/L (Retention time: 14.15 min) (D) Mass spectrum of fengycin (quantification ion: m/z 70.2 and qualification ion: m/z 84.2)

## Supplementary Table S1

MRM transition parameters of analytes in LC-MS/MS

| Compound  | Precursor ion<br>(m/z) | Product ion<br>(m/z) | DP <sup>b)</sup><br>(V) | EP <sup>c)</sup><br>(V) | CE <sup>d)</sup><br>(V) | Ionization<br>mode            |
|-----------|------------------------|----------------------|-------------------------|-------------------------|-------------------------|-------------------------------|
| Iturin A  | 1043.47                | 70.1 <sup>a)</sup>   | 161.0                   | 6.0                     | 177.0                   | Positive<br>ESI <sup>e)</sup> |
|           |                        | 183.9                | 161.0                   | 14.0                    | 107.0                   |                               |
| Surfactin | 1036.59                | 86.0 <sup>a)</sup>   | 196.0                   | 6.0                     | 119.0                   | Positive<br>ESI <sup>e)</sup> |
|           |                        | 685.5                | 196.0                   | 14.0                    | 45.0                    |                               |
| Fengycin  | 732.26                 | 70.1                 | 121.0                   | 6.0                     | 133.0                   | Positive<br>ESI <sup>e)</sup> |
|           |                        | 84.0                 | 121.0                   | 14.0                    | 121.0                   |                               |

<sup>a)</sup>Quantitation ion, <sup>b)</sup>Declustering potential, <sup>c)</sup>Entrance potential, <sup>d)</sup>Collision energy

<sup>e)</sup>Electrospray ionization.
